# Supplementary material for: Protocol Optimization for the Production of the Non-Cytotoxic JΔNI5 HSV Vector Deficient in Expression of Immediately Early Genes
Source: PubMed Central journal article supplement — Mol Ther Methods Clin Dev. 2020 Mar 17;17:612–21. doi: 10.1016/j.omtm.2020.03.014 (PMC7150431; doi:10.1016/j.omtm.2020.03.014), 2020-03-17

OMTM, Volume 17

## **Supplemental Information**

### **Protocol Optimization for the Production of the Non-Cytotoxic J $\Delta$ NI5 HSV Vector Deficient in Expression of Immediately Early Genes**

**Seiji Kuroda, Yoshitaka Miyagawa, Yuriko Sato, Motoko Yamamoto, Kumi Adachi, Hiromi Kinoh, William F. Goins, Justus B. Cohen, Joseph C. Glorioso, Nobuhiko Taniai, Hiroshi Yoshida, and Takashi Okada**

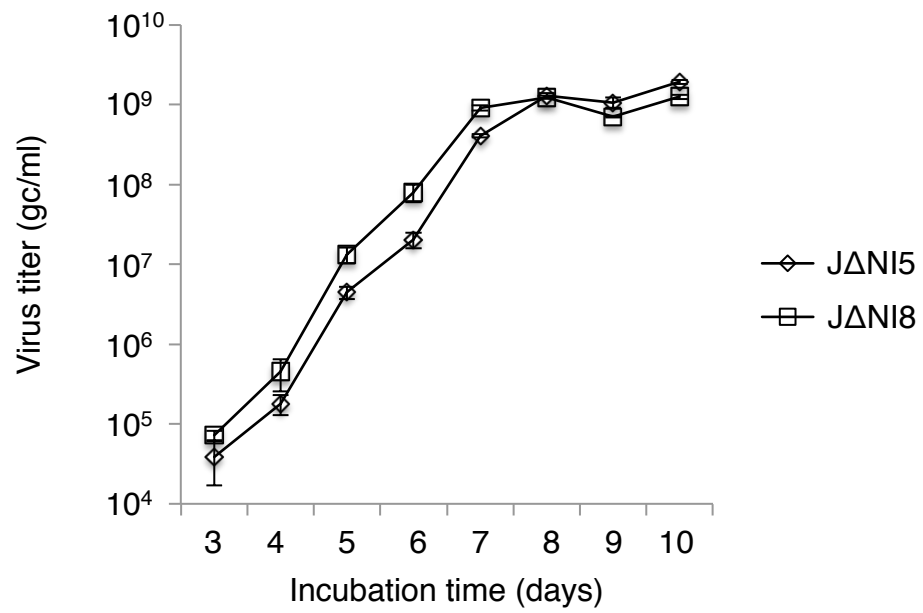

**A**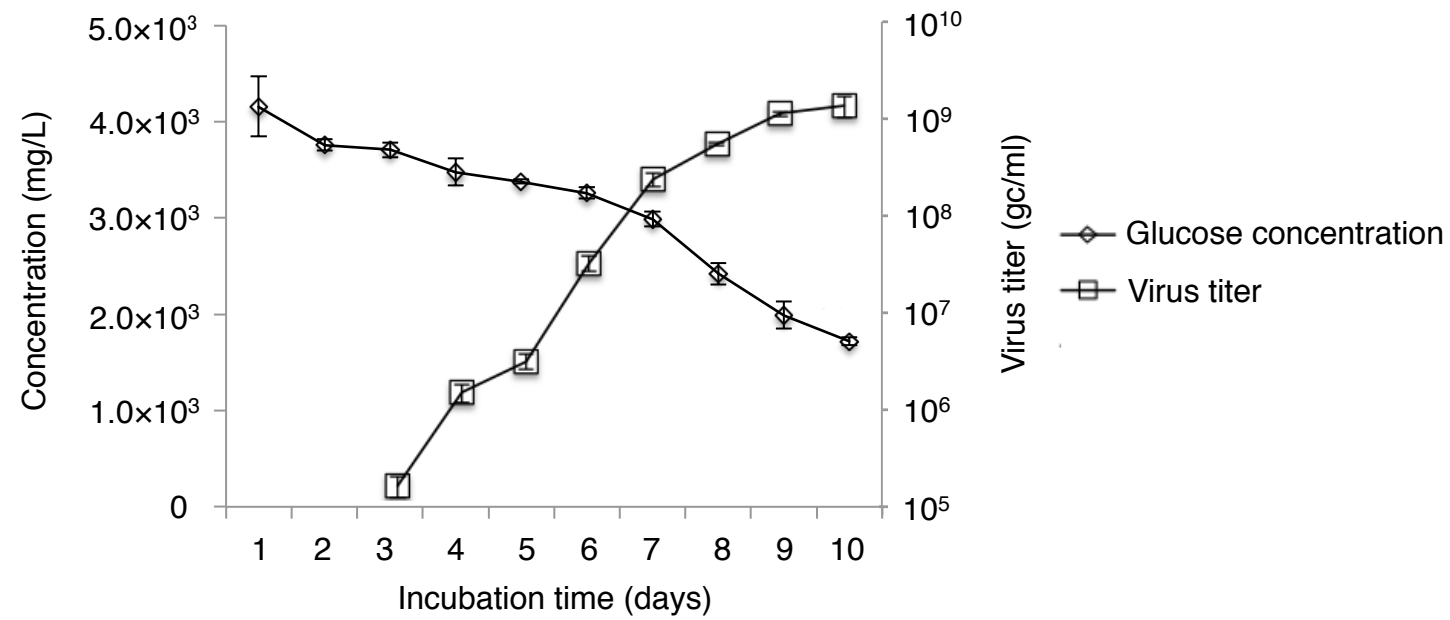**B**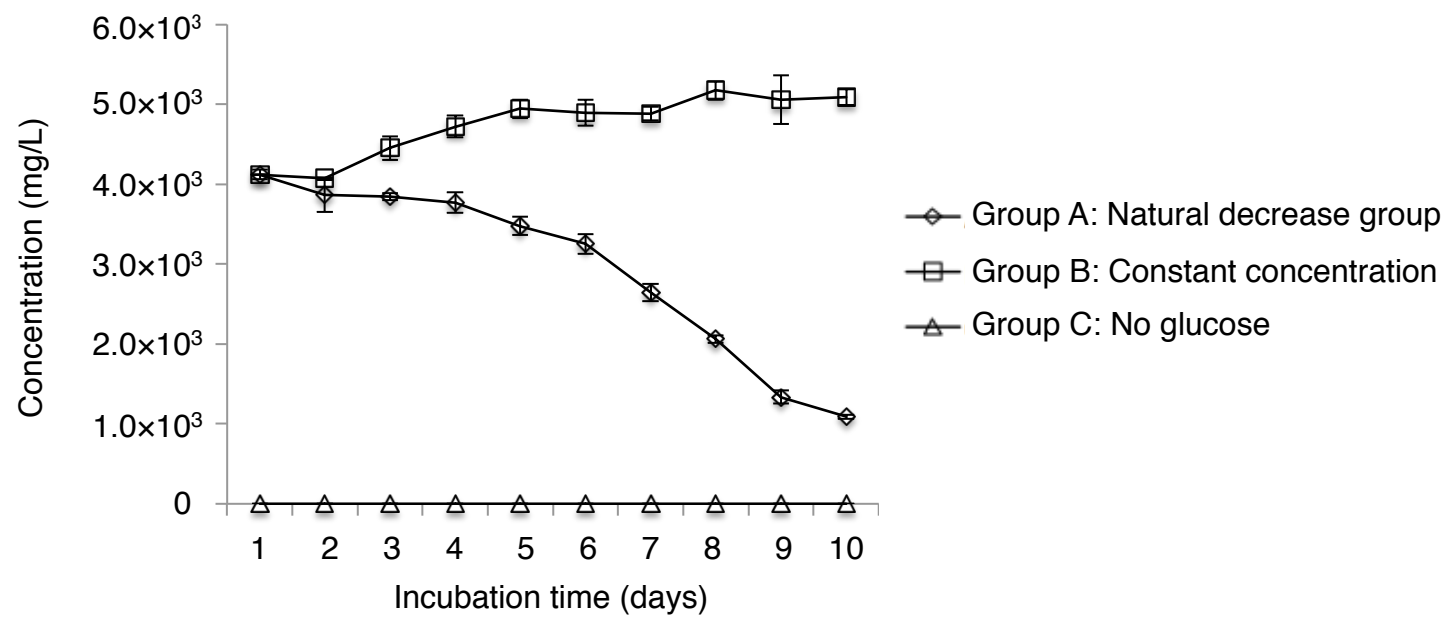

Supplement: mmc1.pdf [file mmc1.pdf]
